# Supplementary material for: lncRNA MALAT1 participates in metformin inhibiting the proliferation of breast cancer cell
Source: PubMed Central journal article supplement (PMC8335702; doi:10.1111/jcmm.16742), 2021-06-24

lncRNA MALAT1 participates in metformin inhibiting the proliferation of breast cancer cell

Running Title: MALAT1 in metformin treatment

Yongye Huang<sup>1</sup>, Ziyang Zhou<sup>1</sup>, Jin Zhang<sup>1</sup>, Zhenzhen Hao<sup>1</sup>, Yunhao He<sup>1</sup>, Zihan Wu<sup>1</sup>,  
Yiquan Song<sup>1</sup>, Kexun Yuan<sup>1</sup>, Shanyu Zheng<sup>1</sup>, Qi Zhao<sup>2,\*</sup>, Tianye Li<sup>1,\*</sup>, Bing Wang<sup>1,\*</sup>

<sup>1</sup> College of Life and Health Sciences, Northeastern University, Shenyang, 110169, China;

<sup>2</sup> School of Computer Science and Software Engineering, University of Science and Technology  
Liaoning, Anshan, 114051, China.

\*To whom correspondence should be addressed: Tel: +86-24-83656116. Fax: +86-24-83656116.

E-mail: [zhaoqi@lnu.edu.cn](mailto:zhaoqi@lnu.edu.cn) (Qi Zhao), [kafaidou1991@163.com](mailto:kafaidou1991@163.com) (Tianye Li),  
[wangbing@mail.neu.edu.cn](mailto:wangbing@mail.neu.edu.cn) (Bing Wang).

Figure S1. Expression of Wnt signaling genes in metformin treated cells. (A) mRNA expression as determined by qPCR (mean  $\pm$  SEM of duplicate experiments). (B) Protein expression as examined by Western blot analysis. (C) Densitometry of (B) was calculated by comparing with internal protein  $\beta$ -actin. \* $p$ <0.05 versus control, and \*\* $p$ <0.01 versus control.

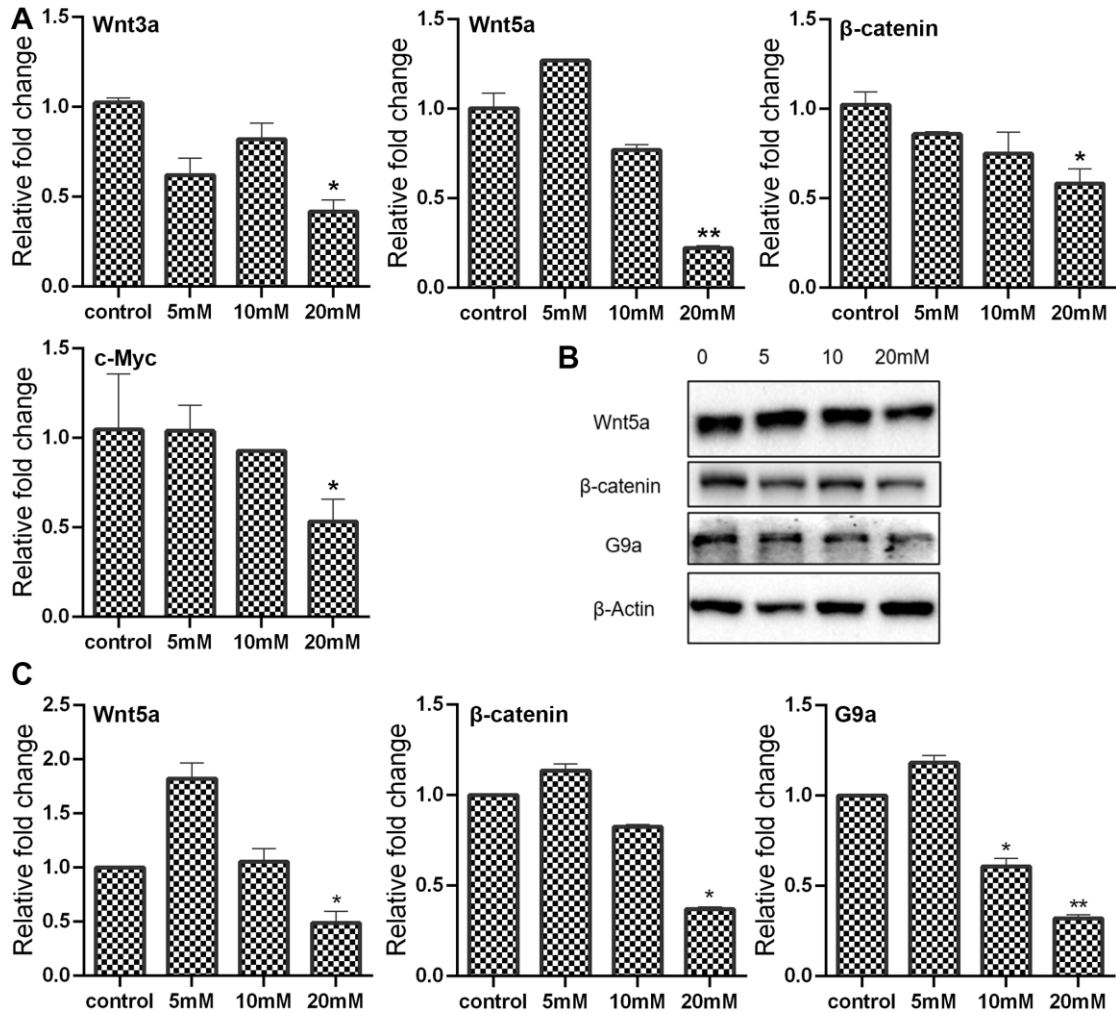

Figure S2. Expression of epigenetic genes in metformin treated cells. (A) mRNA expression as determined by qPCR (mean  $\pm$  SEM of duplicate experiments). (B) Protein expression as examined by Western blot analysis. (C) Densitometry of (B) was calculated by comparing with internal protein H3. \* $p$ <0.05 versus control, \*\* $p$ <0.01 versus control and \*\*\* $p$ <0.001 versus control.

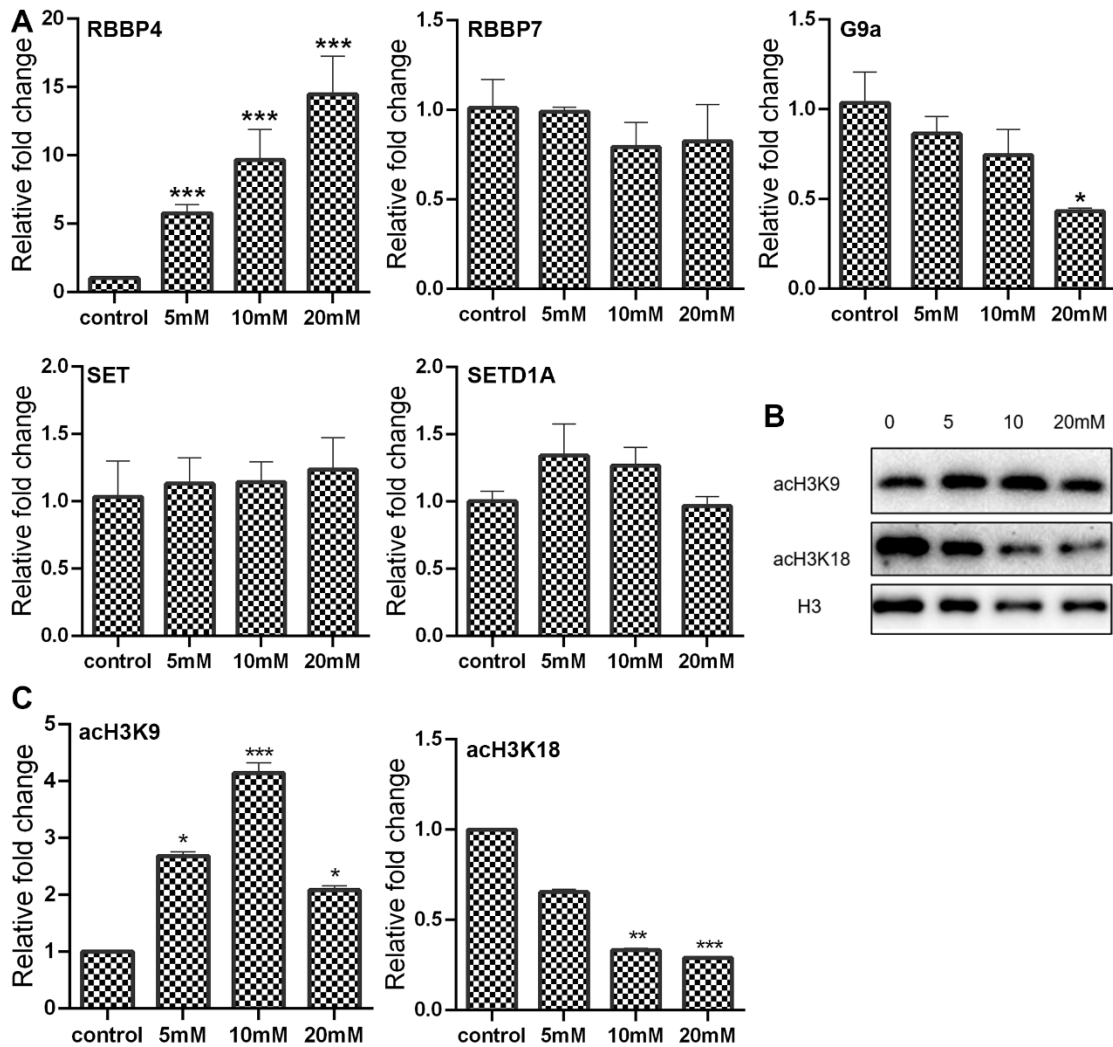

Figure S3. Expression of ER stress related genes in metformin treated cells in combination with MALAT1 knockdown. (A) mRNA expression as accessed by qPCR (mean  $\pm$  SEM of duplicate experiments). (B) Protein expression as measured by Western blot analysis. (C) Densitometry of (B) was calculated by comparing with internal protein GAPDH. \* $p$ <0.05 versus control, \*\* $p$ <0.01 versus control and \*\*\* $p$ <0.001 versus control. siNeg, cells treated with negative control siRNA; siMALAT1, cells treated with MALAT1 siRNA; siNeg+Met, cells treated with negative control siRNA in combination with metformin; siMALAT+Met, cells treated with MALAT1 siRNA in combination with metformin.

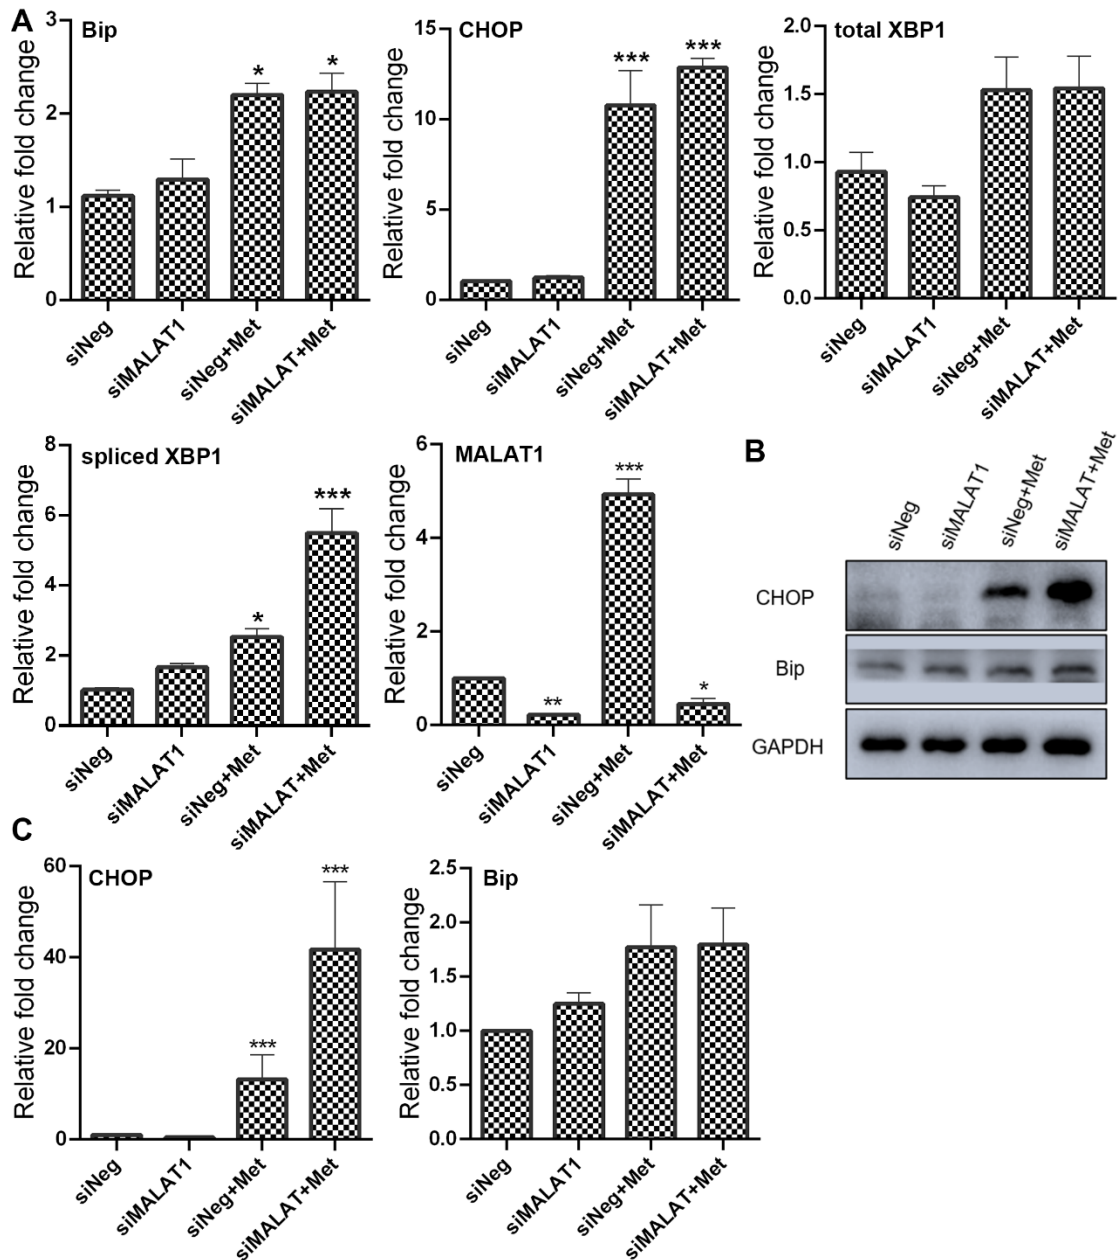

Figure S4. Densitometry in Western blot analysis was calculated by comparing with internal protein  $\beta$ -actin or GAPDH. \* $p$ <0.05 versus control, \*\* $p$ <0.01 versus control and \*\*\* $p$ <0.001 versus control.

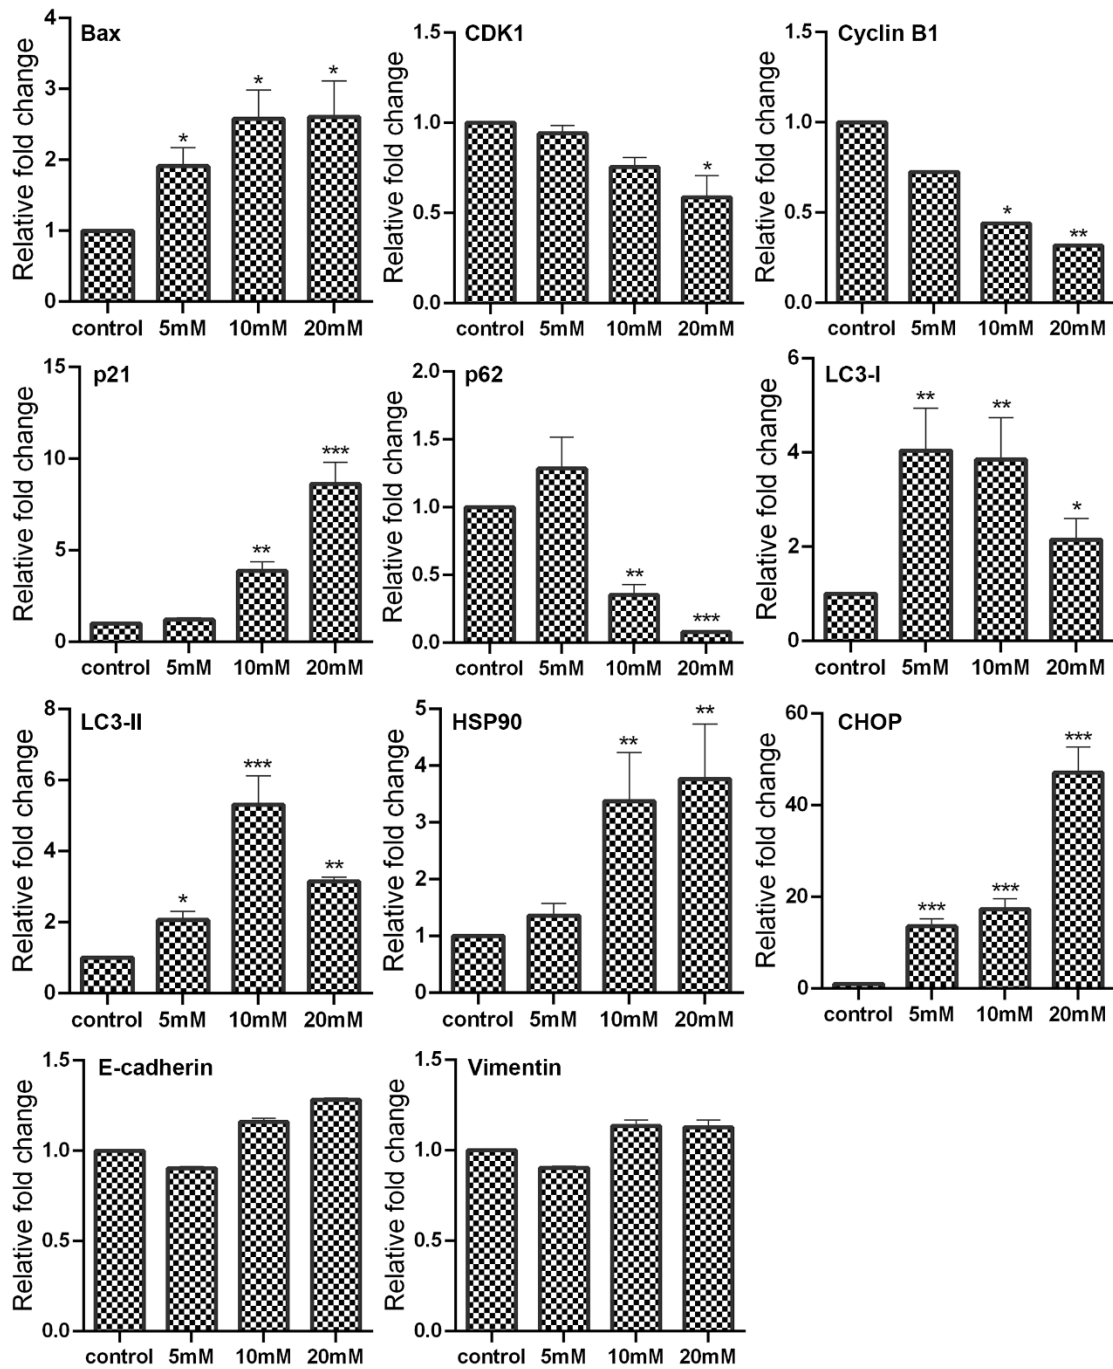

Figure S5. Densitometry in Western blot analysis was calculated by comparing with internal protein  $\beta$ -actin or GAPDH. \* $p$ <0.05 versus control, \*\* $p$ <0.01 versus control and \*\*\* $p$ <0.001 versus control. siNeg, cells treated with negative control siRNA; siMALAT1, cells treated with MALAT1 siRNA; siNeg+Met, cells treated with negative control siRNA in combination with metformin; siMALAT1+Met, cells treated with MALAT1 siRNA in combination with metformin.

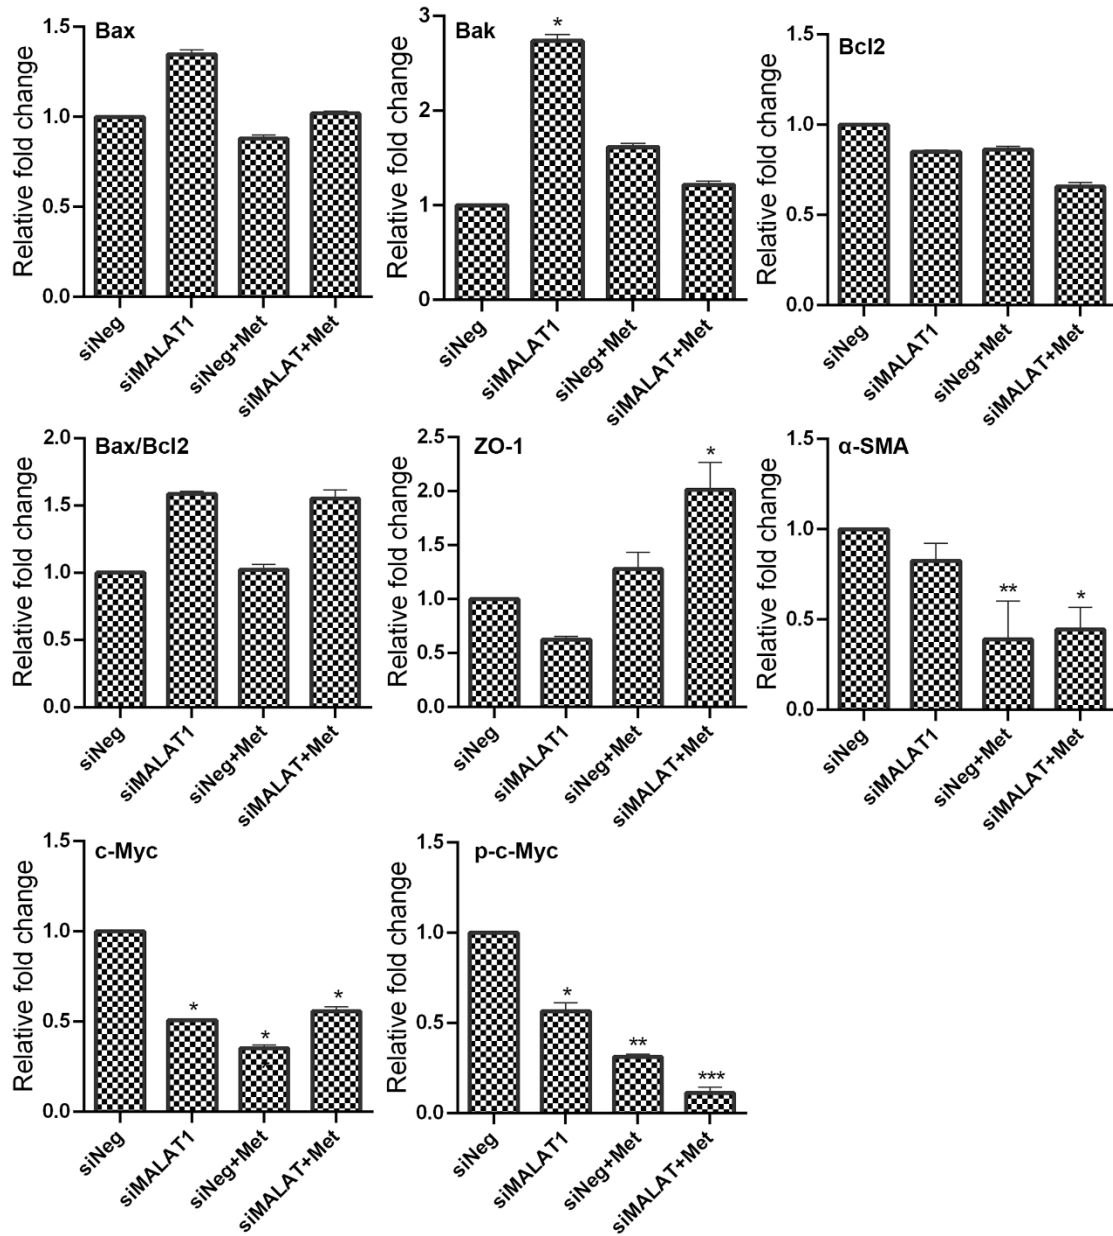

Figure S6. Densitometry in Western blot analysis was calculated by comparing with internal protein  $\beta$ -actin or GAPDH. \* $p < 0.05$  versus control, \*\* $p < 0.01$  versus control and \*\*\* $p < 0.001$  versus control. siNeg, cells treated with negative control siRNA; siMALAT1, cells treated with MALAT1 siRNA; siNeg+Met, cells treated with negative control siRNA in combination with metformin; siMALAT1+Met, cells treated with MALAT1 siRNA in combination with metformin.

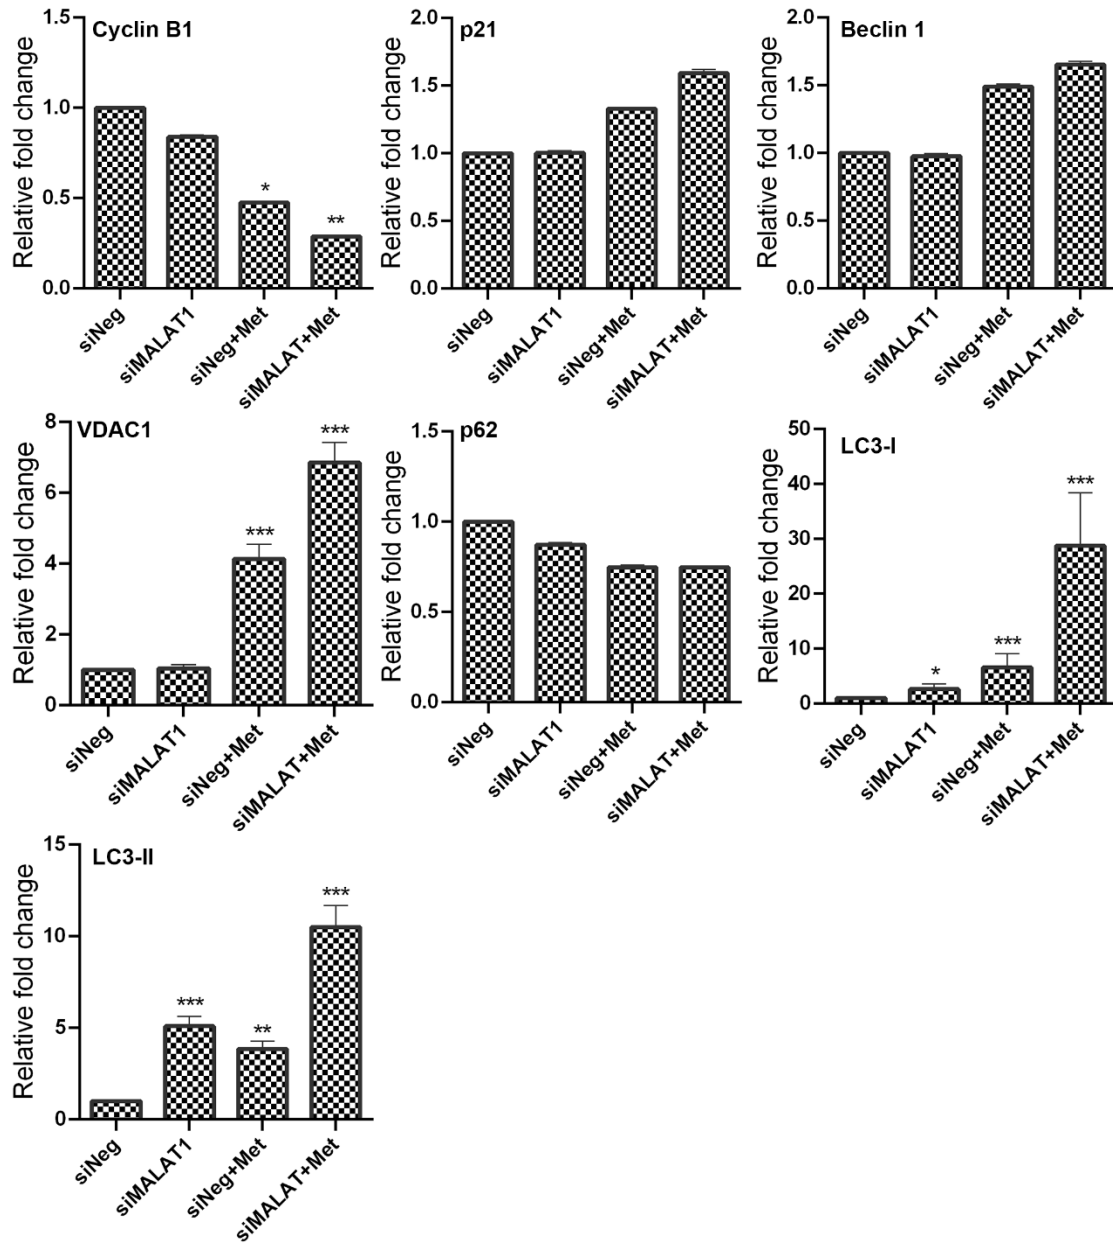

Supplement: JCMM-25-7135-s003.pdf [file JCMM-25-7135-s003.pdf]
